# Supplementary material for: Hunter-Gatherer Social Networks and Reproductive Success
Source: PubMed Central journal article supplement (PMC5430806; doi:10.1038/s41598-017-01310-5), 2017-04-25
Supplement: 41598_2017_1310_MOESM1_ESM.pdf [file 41598_2017_1310_MOESM1_ESM.pdf]

**Hunter-Gatherer Social Networks and Reproductive Success: Supplementary information**

**Authors:** Abigail E. Page\*, Nikhil Chaudhary, Sylvain Viguier, Mark Dyble, James Thompson, Daniel Smith, Gul. D. Salali, Ruth Mace and Andrea. Bamberg Migliano

**Authors' affiliation:** Department of Anthropology, University College London, 14 Taviton Street, London WC1H 0BW, UK.

**Correspondence to:** [abigail.page.10@ucl.ac.uk](mailto:abigail.page.10@ucl.ac.uk)

## **SI methods**

### **Household belongings**

To create an 'emic' based list, we first sought to establish the most important items from a sub-sample ( $n = 16$ ) of households. We asked each household to name 10 of the most important belongings an Agta could own. Based on this we created a list of 14 household items that were mentioned the most frequently. This list was then shown to each household, asking whether they had these items and if they did, how many did they have. As some items were more important than others we weighted each item according to the number of times it appeared in the list. For instance, as most households owned cooking pots, a family without one would be considered quite 'poor' since these are an essential daily item. Thus, these items were weighted the highest. This system assumes that the 'most common' are the most valued, since it would be erroneous to compare cooking pots to spoons 1-to-1. However, it does undervalue rare, luxury items (such as radios or guns). The object, count and proportion can be found in Table S1. Overall, this method was thought to be more nuanced than taking the monetary value of items since this is unlikely to be directly reflective of the value the Agta place in the items.

**Table S1:** List of household objects and their weighting used in creation of household belonging variable.

| Item        | $n$ | Proportion | Weight |
|-------------|-----|------------|--------|
| Goggles     | 31  | 0.053      | 5      |
| Blanket     | 37  | 0.063      | 6      |
| Hunting bow | 7   | 0.012      | 1      |
| Cups        | 65  | 0.111      | 11     |
| Air gun     | 5   | 0.009      | 1      |
| Kettle      | 45  | 0.077      | 8      |
| Knife       | 65  | 0.111      | 11     |
| Mat         | 15  | 0.026      | 3      |
| Net         | 12  | 0.020      | 2      |
| Plates      | 93  | 0.158      | 16     |
| Cooking pot | 123 | 0.210      | 21     |
| Radio       | 4   | 0.007      | 1      |
| Spear gun   | 35  | 0.060      | 6      |
| Spoon       | 50  | 0.085      | 9      |
| Total       | 587 | 1.000      |        |

## Motes

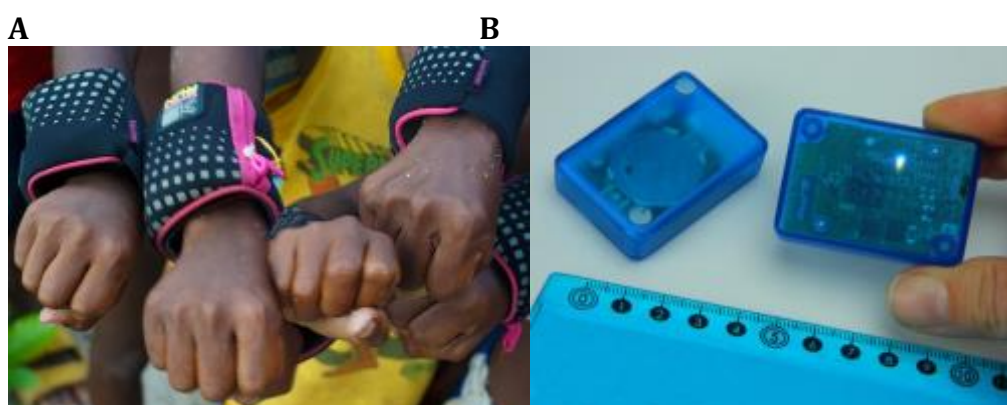

**Figure S1:** Mote utilisation in the field. (A) Motes switched on before packaging and (B) Agta children wearing their motes in armbands. Credit: Rodolph Schlaepfer and Sylvain Viguiere

### ***Comparison of motes data to observed proximity data***

The innovative usage of remote sensing technologies to create high-density proximity networks required justification. Therefore, to establish whether or not the motes were, in fact, recording proximity at approximately three meters we compared this data to observational data from five toddlers (aged between two to five years) produced using focal sampling techniques (Meehan 2005; Meehan *et al.* 2013b; Fouts *et al.* 2005; Hewlett *et al.* 2000). In this technique a focal child is observed for 12 hours over several days to ensure a range of activities are captured. This 12-hour period is broken into three 4-hour intervals (6:00 – 10:00, 10:00 – 14:00 and 14:00 – 18:00) during which, the researcher records who is interacting with a child and what type of interaction this is every 20 seconds (observe for 20 seconds, record for 10 seconds) within a three meter radius. These 4-hour intervals were conducted on non-consecutive days to reduce any sampling bias (i.e. the father was out of camp for those two days). Due to the intensive nature of the data collection, 15-minute breaks are essential every hour, thus in total each child was observed for 9 hours. This produces 1,080 observational points per child over three days, compared to an average of 3,150 mote points over one week.

**Table S2:** Proportion of time toddlers spent with any given kin category for motes and focal observations. GP refers to grandparents. Non-kin are all individuals related less than  $r = 0.125$ , and other kin between 0.25 and 0.125. Categories that include multiple individuals (such as GP, siblings, other and non-kin) are summed across category, thus toddlers spend 23% of time with all non-kin, however, on average they spend only 2% of their time with any given non-kin individual. These proportions are not out of 1 since children can often be with more than one individual.

|                  | <b>Motes</b> | <b>Focals</b> |
|------------------|--------------|---------------|
| <b>Mother</b>    | 0.34         | 0.37          |
| <b>Father</b>    | 0.11         | 0.19          |
| <b>GP</b>        | 0.06         | 0.02          |
| <b>Siblings</b>  | 0.24         | 0.24          |
| <b>Other kin</b> | 0.07         | 0.08          |
| <b>Non-kin</b>   | 0.23         | 0.24          |

To compare these two types of data, means were produced for the proportion of time five toddlers spent with specific kin categories. These differences are minimal, and the distribution of observations with specific kin types is not significantly altered between the two methods. For instance, the motes recorded that toddlers spent on average  $34 \pm 26\%$  of time with mothers,  $11 \pm 5\%$  of time with fathers,  $24 \pm 13\%$  of time with siblings and  $6 \pm 6\%$ ,  $7 \pm 7\%$  and  $23 \pm 13\%$  for grandparents, other kin ( $r \leq 0.25$  and  $\geq 0.125$ ) and non-kin ( $r < 0.125$ ), respectively (Table S2). These same toddlers were observed to spend  $37 \pm 26\%$  of time within three-meters of their mothers,  $19 \pm 19\%$  with fathers,  $24 \pm 19\%$  with siblings and  $2 \pm 1\%$ ,  $7 \pm 8\%$  and  $24 \pm 20\%$  of their time with grandparents, other kin and non-kin, respectively (Figure S2). Therefore, the two types of data collection produce remarkably consistent and similar pictures of proximity at three meters. Overall, the consistency between the observational and motes data leads us to conclude motes have a high reliability and represent proximity at approximately three meters.

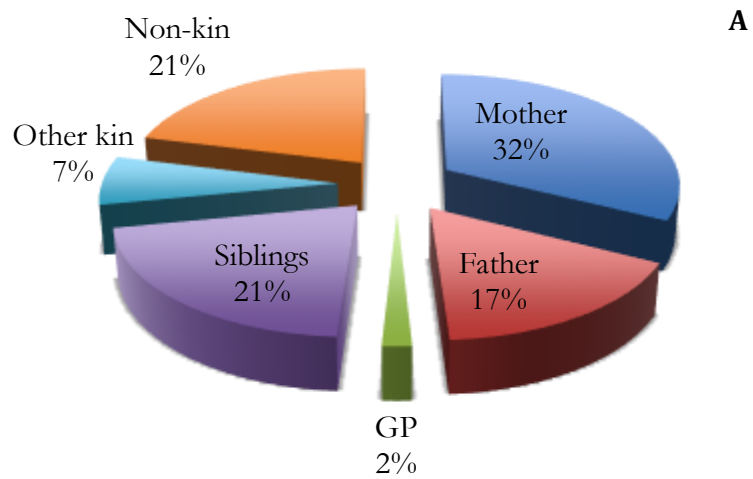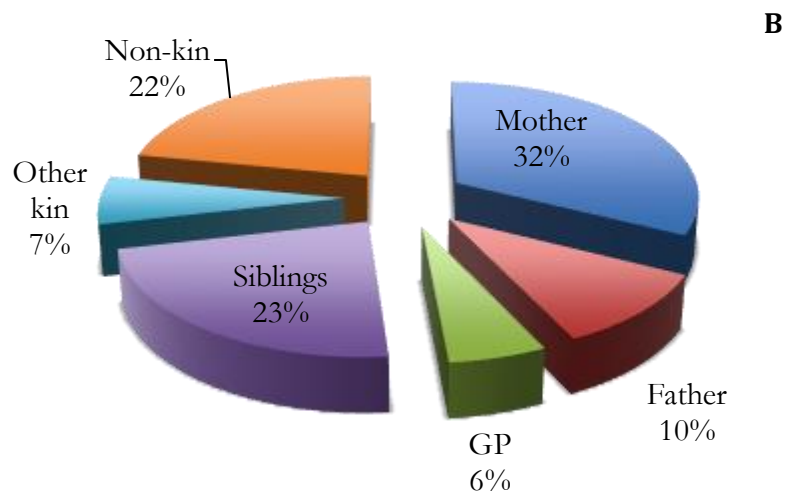

**Figure S2:** Proportion of time toddlers spent with different kin categories for data collected by (A) focal observations and (B) notes. GP represents grandparents.

## SI Results

### Model normality results

**Table S3:** Results from Shapiro-Wilk normality tests for each of the models reported. As no tests reach statistical significance ( $p < 0.05$ ) this reveals that all models met the assumption in linear models that the residuals are normally distributed.

|          |             | Shapiro-Wilk Normality Test |          |
|----------|-------------|-----------------------------|----------|
|          |             | <i>W</i>                    | <i>p</i> |
| BaYaka   | Degree      | 0.963                       | 0.249    |
|          | Strength    | 0.972                       | 0.461    |
|          | Betweenness | 0.956                       | 0.154    |
|          | EC          | 0.980                       | 0.727    |
|          | Closeness   | 0.954                       | 0.126    |
| Agta     | Degree      | 0.969                       | 0.365    |
|          | Strength    | 0.983                       | 0.811    |
|          | Betweenness | 0.971                       | 0.426    |
|          | EC          | 0.985                       | 0.885    |
|          | Closeness   | 0.984                       | 0.839    |
| Sickness | Degree      | 0.976                       | 0.625    |
|          | Strength    | 0.953                       | 0.144    |
|          | Betweenness | 0.966                       | 0.352    |
|          | EC          | 0.945                       | 0.091    |
|          | Closeness   | 0.975                       | 0.608    |

## Variance inflation scores

**Table S4:** Betweenness VIFs when degree was also included in the model.

| <b>Betweenness VIFs</b> |            |           |                               |
|-------------------------|------------|-----------|-------------------------------|
| <b>Variable</b>         | <b>VIF</b> | <b>Df</b> | <b>VIF<sup>1/(2*Df)</sup></b> |
| Betweenness z-score     | 1.523621   | 1         | 1.23435                       |
| Age centered            | 1.805471   | 1         | 1.343678                      |
| Degree z-score          | 1.164511   | 1         | 1.079125                      |
| Camp                    | 1.161493   | 5         | 1.015083                      |
| Between*age             | 1.841236   | 1         | 1.356922                      |

**Table S5:** Closeness VIFs when degree was also included in the model.

| <b>Closeness VIFs</b> |            |           |                               |
|-----------------------|------------|-----------|-------------------------------|
| <b>Variable</b>       | <b>VIF</b> | <b>Df</b> | <b>VIF<sup>1/(2*Df)</sup></b> |
| Closeness z-score     | 1.254917   | 1         | 1.120231                      |
| Age centered          | 1.037709   | 1         | 1.01868                       |
| Degree z-score        | 1.300208   | 1         | 1.140266                      |
| Camp                  | 1.315268   | 5         | 1.027783                      |
| Between*age           | 1.386373   | 1         | 1.177444                      |

## Correlations of centrality

As revealed by Fig. S3 betweenness and closeness are significantly positively correlated in both populations. Strength, degree and eigenvector centrality are strongly positively correlated. Therefore, measures of how many social ties individuals had, or how strong these ties are capture similar trends. Closeness was negatively correlated with degree, strength and EC (however not in the BaYaka data). While in the BaYaka betweenness is negatively correlated with degree this relationship is not significant in the Agta dataset, but reveals the same overall trends. As a result, betweenness and closeness represent similar network trends, in rough opposition to the trends presented by degree, strength and EC.

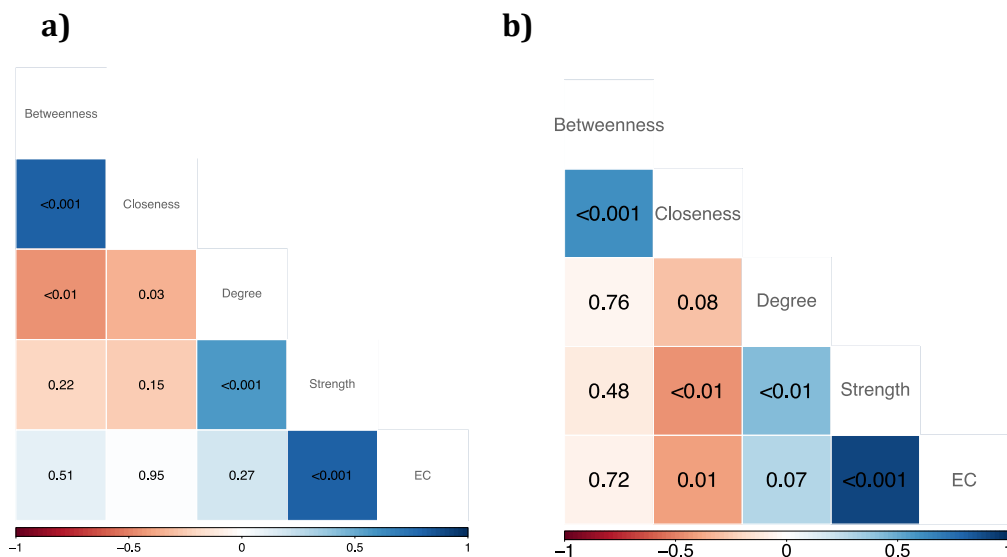

**Figure S3:** Correlation plot for the five different measures of network centrality for A) 38 BaYaka mothers and B) 39 Agta mothers. Darker shades represent stronger correlations, blue shades positive correlations, red shades negative correlations. Each correlation box contains the relevant dyadic p-value.



### Full model outputs

All models were run with an interaction with age. If the term was not significant the non-interaction model was presented in the main text. Models are presented with relevant AIC value for model comparison.

#### *Agta*

*EC:*

|             | Interaction model |       |        |        | Non-interaction model |       |        |        |
|-------------|-------------------|-------|--------|--------|-----------------------|-------|--------|--------|
|             | B                 | P     | CI     | CI     | B                     | P     | CI     | CI     |
| (Intercept) | 2.544             | 0.070 | -0.226 | 5.313  | 2.793                 | 0.041 | 0.116  | 5.470  |
| EC          | -1.130            | 0.093 | -2.460 | 0.199  | -1.070                | 0.103 | -2.371 | 0.230  |
| Age         | 0.390             | 0.558 | -0.957 | 1.737  | -                     | -     | -      | -      |
| Camp 1      | -1.808            | 0.284 | -5.196 | 1.580  | -2.029                | 0.219 | -5.326 | 1.269  |
| Camp 2      | -3.283            | 0.039 | -6.390 | -0.176 | -3.593                | 0.020 | -6.583 | -0.604 |
| Camp 3      | -2.358            | 0.149 | -5.606 | 0.891  | -2.558                | 0.110 | -5.725 | 0.608  |
| Camp 4      | -2.461            | 0.109 | -5.504 | 0.582  | -2.687                | 0.073 | -5.643 | 0.269  |
| Camp 5      | -1.642            | 0.285 | -4.721 | 1.438  | -1.970                | 0.183 | -4.921 | 0.981  |
| EC*age      | -1.318            | 0.326 | -4.017 | 1.380  | -                     | -     | -      | -      |
| AIC         | 165.614           |       |        |        | 163.012               |       |        |        |

*Strength:*

|              | Interaction model |       |        |        | Non-interaction model |       |        |        |
|--------------|-------------------|-------|--------|--------|-----------------------|-------|--------|--------|
|              | B                 | P     | CI     | CI     | B                     | P     | CI     | CI     |
| (Intercept)  | 2.623             | 0.063 | -0.157 | 5.402  | 2.906                 | 0.035 | 0.214  | 5.598  |
| Strength     | -1.378            | 0.063 | -2.838 | 0.082  | -1.068                | 0.110 | -2.393 | 0.256  |
| Age          | 0.316             | 0.627 | -1.002 | 1.634  | -                     | -     | -      | -      |
| Camp 1       | -2.084            | 0.221 | -5.491 | 1.322  | -2.240                | 0.182 | -5.586 | 1.105  |
| Camp 2       | -3.329            | 0.038 | -6.451 | -0.206 | -3.720                | 0.017 | -6.716 | -0.724 |
| Camp 3       | -2.505            | 0.126 | -5.755 | 0.745  | -2.697                | 0.094 | -5.881 | 0.488  |
| Camp 4       | -2.547            | 0.097 | -5.581 | 0.487  | -2.766                | 0.066 | -5.727 | 0.195  |
| Camp 5       | -1.716            | 0.265 | -4.805 | 1.373  | -2.073                | 0.165 | -5.048 | 0.902  |
| Strength*age | -1.845            | 0.276 | -5.245 | 1.554  | -                     | -     | -      | -      |
| AIC          | 165.493           |       |        |        | 163.138               |       |        |        |

*Degree:*

|             | Interaction model |       |        |        | Non-interaction model |       |        |        |
|-------------|-------------------|-------|--------|--------|-----------------------|-------|--------|--------|
|             | B                 | P     | CI     | CI     | B                     | P     | CI     | CI     |
| (Intercept) | 1.465             | 0.272 | -1.212 | 4.141  | 2.186                 | 0.103 | -0.470 | 4.842  |
| Degree      | -1.499            | 0.019 | -2.735 | -0.263 | -1.297                | 0.044 | -2.553 | -0.040 |
| Age         | 0.392             | 0.517 | -0.831 | 1.615  | -                     | -     | -      | -      |
| Camp 1      | -0.237            | 0.883 | -3.501 | 3.028  | -0.957                | 0.556 | -4.238 | 2.324  |
| Camp 2      | -2.327            | 0.122 | -5.309 | 0.656  | -3.121                | 0.040 | -6.083 | -0.159 |
| Camp 3      | -1.616            | 0.289 | -4.671 | 1.440  | -2.129                | 0.172 | -5.234 | 0.976  |
| Camp 4      | -1.523            | 0.296 | -4.446 | 1.401  | -2.127                | 0.151 | -5.071 | 0.818  |
| Camp 5      | -0.232            | 0.874 | -3.207 | 2.743  | -1.188                | 0.410 | -4.087 | 1.712  |
| Degree*Age  | -2.577            | 0.053 | -5.184 | 0.029  | -                     | -     | -      | -      |
| AIC         | 160.181           |       |        |        | 161.241               |       |        |        |

*Betweenness:*

|             | Interaction model |       |        |        | Non-interaction model |       |        |        |
|-------------|-------------------|-------|--------|--------|-----------------------|-------|--------|--------|
|             | B                 | P     | CI     | CI     | B                     | P     | CI     | CI     |
| (Intercept) | 3.069             | 0.007 | 0.922  | 5.215  | 2.946                 | 0.032 | 0.277  | 5.615  |
| Betweenness | 2.445             | 0.000 | 1.247  | 3.643  | 1.151                 | 0.077 | -0.133 | 2.434  |
| Age         | 1.715             | 0.007 | 0.506  | 2.923  | -                     | -     | -      | -      |
| Camp 1      | -1.367            | 0.295 | -3.986 | 1.252  | -1.767                | 0.276 | -5.017 | 1.482  |
| Camp 2      | -3.340            | 0.008 | -5.731 | -0.948 | -3.718                | 0.016 | -6.686 | -0.751 |
| Camp 3      | -2.841            | 0.029 | -5.378 | -0.304 | -2.729                | 0.088 | -5.884 | 0.427  |
| Camp 4      | -3.131            | 0.012 | -5.517 | -0.744 | -3.111                | 0.040 | -6.076 | -0.146 |
| Camp 5      | -1.998            | 0.095 | -4.365 | 0.369  | -2.088                | 0.158 | -5.030 | 0.855  |
| Between*age | 6.026             | 0.000 | 3.185  | 8.867  | -                     | -     | -      | -      |
| AIC         | 147.078           |       |        |        | 162.425               |       |        |        |

*Betweenness and degree:*

|             | Betweenness and degree model |       |        |        |
|-------------|------------------------------|-------|--------|--------|
|             | B                            | P     | CI     | CI     |
| (Intercept) | 3.107                        | 0.009 | 0.850  | 5.364  |
| Betweenness | 2.480                        | 0.001 | 1.156  | 3.805  |
| Age         | 1.750                        | 0.012 | 0.414  | 3.086  |
| Degree      | 0.089                        | 0.889 | -1.208 | 1.386  |
| Camp 1      | -1.409                       | 0.301 | -4.147 | 1.329  |
| Camp 2      | -3.366                       | 0.009 | -5.833 | -0.899 |
| Camp 3      | -2.866                       | 0.033 | -5.477 | -0.255 |
| Camp 4      | -3.174                       | 0.015 | -5.688 | -0.661 |
| Camp 5      | -2.031                       | 0.102 | -4.489 | 0.427  |
| Between*age | 6.171                        | 0.001 | 2.585  | 9.757  |
| AIC         | 149.051                      |       |        |        |

*Closeness:*

|             | Interaction model |       |        |       | Non-interaction model |       |        |        |
|-------------|-------------------|-------|--------|-------|-----------------------|-------|--------|--------|
|             | B                 | P     | CI     | CI    | B                     | P     | CI     | CI     |
| (Intercept) | 1.611             | 0.207 | -0.941 | 4.163 | 2.748                 | 0.039 | 0.153  | 5.342  |
| Closeness   | 1.674             | 0.007 | 0.493  | 2.854 | 1.353                 | 0.034 | 0.108  | 2.597  |
| Age         | 0.671             | 0.271 | -0.553 | 1.895 | -                     | -     | -      | -      |
| Camp 1      | -0.808            | 0.593 | -3.865 | 2.248 | -1.885                | 0.236 | -5.066 | 1.296  |
| Camp 2      | -2.178            | 0.129 | -5.031 | 0.676 | -3.434                | 0.022 | -6.340 | -0.528 |
| Camp 3      | -1.308            | 0.374 | -4.269 | 1.654 | -2.410                | 0.120 | -5.479 | 0.660  |
| Camp 4      | -1.763            | 0.205 | -4.547 | 1.020 | -2.834                | 0.053 | -5.703 | 0.036  |
| Camp 5      | -0.757            | 0.582 | -3.541 | 2.026 | -1.925                | 0.178 | -4.776 | 0.926  |
| Close*age   | 3.613             | 0.011 | 0.885  | 6.340 | -                     | -     | -      | -      |
| AIC         | 156.140           |       |        |       | 160.723               |       |        |        |

Closeness and degree:

|             | Closeness and degree model |       |        |       |
|-------------|----------------------------|-------|--------|-------|
|             | B                          | P     | CI     | CI    |
| (Intercept) | 1.570                      | 0.220 | -0.994 | 4.133 |
| Closeness   | 1.548                      | 0.015 | 0.330  | 2.765 |
| Age         | 0.566                      | 0.362 | -0.685 | 1.816 |
| Degree      | -0.587                     | 0.362 | -1.884 | 0.710 |
| Camp 1      | -0.636                     | 0.677 | -3.728 | 2.456 |
| Camp 2      | -2.163                     | 0.133 | -5.028 | 0.701 |
| Camp 3      | -1.351                     | 0.360 | -4.326 | 1.625 |
| Camp 4      | -1.663                     | 0.234 | -4.467 | 1.140 |
| Camp 5      | -0.716                     | 0.604 | -3.512 | 2.080 |
| Between*age | 3.018                      | 0.051 | -0.020 | 6.055 |
| AIC         | 156.992                    |       |        |       |

**BaYaka**

EC:

|             | Interaction model |       |        |       | Non-interaction model |       |        |       |
|-------------|-------------------|-------|--------|-------|-----------------------|-------|--------|-------|
|             | B                 | SE    | CI     | CI    | B                     | P     | CI     | CI    |
| (Intercept) | -0.435            | 0.199 | -1.110 | 0.241 | -0.441                | 0.171 | -1.083 | 0.201 |
| EC          | 0.011             | 0.984 | -1.033 | 1.055 | -0.124                | 0.764 | -0.956 | 0.709 |
| Age         | 0.313             | 0.478 | -0.574 | 1.200 | -                     | -     | -      | -     |
| Camp 1      | 0.475             | 0.291 | -0.426 | 1.376 | 0.448                 | 0.303 | -0.424 | 1.321 |
| Camp 2      | 0.549             | 0.449 | -0.913 | 2.012 | 0.444                 | 0.523 | -0.954 | 1.841 |
| EC*age      | -0.585            | 0.501 | -2.334 | 1.164 | -                     | -     | -      | -     |
| AIC         | 127.950           |       |        |       | 125.176               |       |        |       |

Closeness:

|             | Interaction model |       |        |       | Non-interaction model |       |        |       |
|-------------|-------------------|-------|--------|-------|-----------------------|-------|--------|-------|
|             | B                 | SE    | CI     | CI    | B                     | P     | CI     | CI    |
| (Intercept) | -0.371            | 0.232 | -0.992 | 0.250 | -0.361                | 0.221 | -0.949 | 0.228 |
| Closeness   | 0.940             | 0.025 | 0.128  | 1.752 | 0.962                 | 0.015 | 0.198  | 1.725 |
| Age         | 0.054             | 0.896 | -0.779 | 0.887 | -                     | -     | -      | -     |
| Camp 1      | 0.310             | 0.467 | -0.547 | 1.167 | 0.319                 | 0.423 | -0.480 | 1.117 |
| Camp 2      | 0.306             | 0.653 | -1.069 | 1.680 | 0.282                 | 0.657 | -0.998 | 1.562 |
| Close*age   | 0.270             | 0.750 | -1.442 | 1.982 | -                     | -     | -      | -     |
| AIC         | 127.950           |       |        |       | 118.562               |       |        |       |

*Closeness and degree:*

|             | Closeness and degree model |       |        |       |
|-------------|----------------------------|-------|--------|-------|
|             | B                          | P     | CI     | CI    |
| (Intercept) | -0.374                     | 0.226 | -0.991 | 0.243 |
| Closeness   | 0.930                      | 0.034 | 0.077  | 1.783 |
| Age         | -0.077                     | 0.858 | -0.945 | 0.791 |
| Degree      | 0.339                      | 0.419 | -0.506 | 1.184 |
| Camp 1      | 0.314                      | 0.639 | -1.036 | 1.664 |
| Camp 2      | -0.374                     | 0.226 | -0.991 | 0.243 |
| AIC         | 120.525                    |       |        |       |

*Betweenness:*

|             | Interaction model |       |        |       | Non-interaction model |       |        |       |
|-------------|-------------------|-------|--------|-------|-----------------------|-------|--------|-------|
|             | B                 | SE    | CI     | CI    | B                     | P     | CI     | CI    |
| (Intercept) | -0.466            | 0.138 | -1.089 | 0.158 | -0.451                | 0.132 | -1.045 | 0.143 |
| Betweenness | 0.856             | 0.040 | 0.042  | 1.670 | 0.872                 | 0.029 | 0.098  | 1.646 |
| Age         | 0.137             | 0.741 | -0.697 | 0.970 | -                     | -     | -      | -     |
| Camp 1      | 0.426             | 0.330 | -0.451 | 1.302 | 0.427                 | 0.288 | -0.378 | 1.231 |
| Camp 2      | 0.661             | 0.340 | -0.731 | 2.053 | 0.630                 | 0.332 | -0.673 | 1.932 |
| Between*age | 0.260             | 0.806 | -1.882 | 2.402 | -                     | -     | -      | -     |
| AIC         | 123.599           |       |        |       | 119.817               |       |        |       |

*Betweenness and degree:*

|             | Interaction model |       |        |       |
|-------------|-------------------|-------|--------|-------|
|             | B                 | P     | CI     | CI    |
| (Intercept) | -0.463            | 0.136 | -1.079 | 0.153 |
| Closeness   | 0.834             | 0.063 | -0.048 | 1.717 |
| Age         | -0.085            | 0.850 | -0.985 | 0.816 |
| Degree      | 0.446             | 0.289 | -0.397 | 1.289 |
| Camp 1      | 0.651             | 0.331 | -0.692 | 1.994 |
| Camp 2      | -0.463            | 0.136 | -1.079 | 0.153 |
| AIC         | 121.774           |       |        |       |

*Strength:*

|              | Interaction model |       |        |       | Non-interaction model |       |        |       |
|--------------|-------------------|-------|--------|-------|-----------------------|-------|--------|-------|
|              | B                 | SE    | CI     | CI    | B                     | P     | CI     | CI    |
| (Intercept)  | -0.531            | 0.120 | -1.209 | 0.146 | -0.450                | 0.155 | -1.080 | 0.180 |
| Strength     | -0.515            | 0.276 | -1.463 | 0.433 | -0.395                | 0.331 | -1.209 | 0.419 |
| Age          | 0.335             | 0.436 | -0.530 | 1.199 | -                     | -     | -      | -     |
| Camp 1       | 0.586             | 0.207 | -0.341 | 1.513 | 0.469                 | 0.272 | -0.384 | 1.321 |
| Camp 2       | 0.590             | 0.412 | -0.859 | 2.039 | 0.437                 | 0.522 | -0.936 | 1.811 |
| Strength*age | 0.319             | 0.678 | -1.234 | 1.872 | -                     | -     | -      | -     |
| AIC          | 127.273           |       |        |       | 124.203               |       |        |       |

*Degree:*

|             | Interaction model |       |        |       | Non-interaction model |       |        |       |
|-------------|-------------------|-------|--------|-------|-----------------------|-------|--------|-------|
|             | B                 | SE    | CI     | CI    | B                     | P     | CI     | CI    |
| (Intercept) | -0.559            | 0.093 | -1.217 | 0.099 | -0.517                | 0.109 | -1.154 | 0.121 |
| Degree      | -0.423            | 0.324 | -1.283 | 0.438 | -0.470                | 0.260 | -1.304 | 0.364 |
| Age         | 0.251             | 0.559 | -0.614 | 1.116 | -                     | -     | -      | -     |
| Camp 1      | 0.694             | 0.137 | -0.232 | 1.619 | 0.564                 | 0.195 | -0.302 | 1.430 |
| Camp 2      | 0.723             | 0.319 | -0.733 | 2.180 | 0.622                 | 0.371 | -0.773 | 2.017 |
| Degree*age  | 0.659             | 0.436 | -1.046 | 2.365 | -                     | -     | -      | -     |
| AIC         | 126.752           |       |        |       | 123.832               |       |        |       |

**Sickness models**

*Closeness:*

|                     | Non-Interaction, non-control model |      |       |      | Dependents control and interaction |      |       |      | Non-interaction with dependents control |      |       |      |
|---------------------|------------------------------------|------|-------|------|------------------------------------|------|-------|------|-----------------------------------------|------|-------|------|
|                     | B                                  | P    | CI    | CI   | B                                  | P    | CI    | CI   | B                                       | P    | CI    | CI   |
| (Intercept)         | 0.59                               | 0.29 | -0.55 | 1.73 | 0.29                               | 0.58 | -0.78 | 1.36 | 0.21                                    | 0.67 | -0.80 | 1.22 |
| Closeness           | 0.42                               | 0.01 | 0.10  | 0.74 | 0.25                               | 0.15 | -0.09 | 0.59 | 0.29                                    | 0.05 | 0.01  | 0.58 |
| Wealth              | 0.22                               | 0.37 | -0.27 | 0.71 | 0.00                               | 1.00 | -0.45 | 0.45 | 0.01                                    | 0.95 | -0.43 | 0.46 |
| Age Mobility (1=no) | 0.01                               | 0.08 | 0.00  | 0.03 | 0.01                               | 0.08 | 0.00  | 0.02 | 0.01                                    | 0.08 | 0.00  | 0.02 |
| Settled (1 = yes)   | -0.51                              | 0.15 | -1.21 | 0.19 | -0.42                              | 0.19 | -1.06 | 0.22 | -0.38                                   | 0.21 | -0.99 | 0.23 |
| Camp 1              | 0.09                               | 0.89 | -1.20 | 1.38 | -1.77                              | 0.27 | -0.55 | 1.88 | 0.58                                    | 0.31 | -0.58 | 1.74 |
| Camp 2              | -0.53                              | 0.45 | -1.96 | 0.90 | -3.72                              | 0.67 | -1.11 | 1.69 | 0.18                                    | 0.78 | -1.14 | 1.50 |
| Camp 3              | -0.19                              | 0.57 | -0.89 | 0.51 | -2.73                              | 0.98 | -0.65 | 0.66 | 0.05                                    | 0.88 | -0.58 | 0.67 |
| Camp 4              | -0.51                              | 0.30 | -1.51 | 0.48 | -3.11                              | 0.99 | -0.96 | 0.95 | -0.07                                   | 0.87 | -0.98 | 0.84 |
| Dependent s         | -                                  | -    | -     | -    | 0.20                               | 0.01 | 0.06  | 0.33 | 0.20                                    | 0.00 | 0.07  | 0.33 |
| Close*age           | -                                  | -    | -     | -    | 0.00                               | 0.59 | -0.01 | 0.02 | -                                       | -    | -     | -    |
| AIC                 | 74.92                              |      |       |      | 66.53                              |      |       |      | 64.99                                   |      |       |      |

*Betweenness:*

|                     | Non-Interaction, non-control model |      |       |      | Dependents control and interaction |      |       |      | Non-interaction with dependents control |      |       |      |
|---------------------|------------------------------------|------|-------|------|------------------------------------|------|-------|------|-----------------------------------------|------|-------|------|
|                     | B                                  | P    | CI    | CI   | B                                  | P    | CI    | CI   | B                                       | P    | CI    | CI   |
| (Intercept)         | 1.14                               | 0.00 | 0.50  | 1.77 | 0.85                               | 0.01 | 0.24  | 1.47 | 0.78                                    | 0.01 | 0.18  | 1.39 |
| Between             | 0.50                               | 0.04 | 0.03  | 0.98 | 0.49                               | 0.09 | -0.09 | 1.07 | 0.28                                    | 0.20 | -0.16 | 0.72 |
| Wealth              | 0.67                               | 0.24 | -0.49 | 1.83 | 0.62                               | 0.03 | 0.08  | 1.16 | 0.22                                    | 0.67 | -0.84 | 1.27 |
| Age Mobility (1=no) | 0.45                               | 0.26 | -0.35 | 1.25 | 0.26                               | 0.62 | -0.79 | 1.31 | 0.10                                    | 0.79 | -0.64 | 0.83 |
| Settled (1 = yes)   | 0.54                               | 0.03 | 0.07  | 1.01 | 0.07                               | 0.85 | -0.67 | 0.80 | 0.43                                    | 0.04 | 0.01  | 0.84 |
| Camp 1              | -0.24                              | 0.48 | -0.91 | 0.44 | 0.56                               | 0.06 | -0.02 | 1.14 | 0.73                                    | 0.01 | 0.24  | 1.23 |
| Camp 2              | 0.22                               | 0.74 | -1.12 | 1.55 | -0.26                              | 0.38 | -0.87 | 0.35 | -0.17                                   | 0.55 | -0.76 | 0.42 |
| Camp 3              | -0.82                              | 0.26 | -2.28 | 0.65 | 0.67                               | 0.26 | -0.53 | 1.88 | 0.70                                    | 0.24 | -0.51 | 1.91 |
| Camp 4              | -0.19                              | 0.59 | -0.92 | 0.54 | 0.01                               | 0.98 | -1.37 | 1.40 | 0.00                                    | 1.00 | -1.38 | 1.39 |
| Camp 4              | -0.61                              | 0.24 | -1.66 | 0.43 | -0.05                              | 0.88 | -0.73 | 0.63 | 0.05                                    | 0.87 | -0.60 | 0.71 |
| Dependent s         | -                                  | -    | -     | -    | -0.22                              | 0.65 | -1.22 | 0.77 | -0.10                                   | 0.83 | -1.08 | 0.87 |
| Between*age         | -                                  | -    | -     | -    | 0.74                               | 0.26 | -0.58 | 2.05 | -                                       | -    | -     | -    |
| AIC                 | 77.95                              |      |       |      | 68.55                              |      |       |      | 68.54                                   |      |       |      |

EC:

|                   | Non-Interaction, non-control model |      |       |      | Dependents control and interaction |      |       |      | Non-interaction with dependents control |      |       |      |
|-------------------|------------------------------------|------|-------|------|------------------------------------|------|-------|------|-----------------------------------------|------|-------|------|
|                   | B                                  | P    | CI    | CI   | B                                  | P    | CI    | CI   | B                                       | P    | CI    | CI   |
| (Intercept)       | 1.13                               | 0.00 | 0.44  | 1.81 | 0.71                               | 0.03 | 0.09  | 1.33 | 0.73                                    | 0.02 | 0.11  | 1.35 |
| EC                | -0.25                              | 0.36 | -0.81 | 0.30 | -0.01                              | 0.96 | -0.50 | 0.47 | -0.02                                   | 0.95 | -0.50 | 0.47 |
| Wealth            | 0.43                               | 0.09 | -0.07 | 0.92 | 0.44                               | 0.05 | 0.00  | 0.89 | 0.10                                    | 0.85 | -1.00 | 1.19 |
| Age               | 0.63                               | 0.31 | -0.62 | 1.88 | 0.01                               | 0.98 | -1.10 | 1.12 | 0.11                                    | 0.77 | -0.65 | 0.87 |
| Mobility (1=no)   | 0.54                               | 0.21 | -0.32 | 1.39 | 0.17                               | 0.66 | -0.60 | 0.93 | 0.36                                    | 0.09 | -0.06 | 0.78 |
| Settled (1 = yes) | -0.27                              | 0.48 | -1.07 | 0.52 | 0.83                               | 0.00 | 0.32  | 1.33 | 0.84                                    | 0.00 | 0.33  | 1.34 |
| Camp 1            | 0.21                               | 0.77 | -1.24 | 1.65 | -0.09                              | 0.79 | -0.76 | 0.59 | -0.12                                   | 0.72 | -0.79 | 0.56 |
| Camp 2            | -0.83                              | 0.29 | -2.41 | 0.75 | 0.87                               | 0.17 | -0.40 | 2.14 | 0.81                                    | 0.20 | -0.46 | 2.08 |
| Camp 3            | -0.20                              | 0.60 | -0.99 | 0.58 | 0.08                               | 0.91 | -1.35 | 1.51 | 0.07                                    | 0.92 | -1.36 | 1.50 |
| Camp 4            | -0.47                              | 0.39 | -1.59 | 0.64 | 0.03                               | 0.92 | -0.65 | 0.72 | 0.08                                    | 0.82 | -0.60 | 0.76 |
| Dependent s       | -                                  | -    | -     | -    | 0.10                               | 0.84 | -0.89 | 1.09 | 0.04                                    | 0.93 | -0.94 | 1.03 |
| EC*age            | -                                  | -    | -     | -    | -0.45                              | 0.29 | -1.31 | 0.41 | -                                       | -    | -     | -    |
| AIC               |                                    |      | 82.86 |      |                                    |      | 71.22 |      |                                         |      | 70.95 |      |

Strength:

|                   | Non-Interaction, non-control model |      |       |      | Dependents control and interaction |      |       |      | Non-interaction with dependents control |      |       |      |
|-------------------|------------------------------------|------|-------|------|------------------------------------|------|-------|------|-----------------------------------------|------|-------|------|
|                   | B                                  | P    | CI    | CI   | B                                  | P    | CI    | CI   | B                                       | P    | CI    | CI   |
| (Intercept)       | 1.15                               | 0.00 | 0.45  | 1.84 | 0.66                               | 0.04 | 0.04  | 1.29 | 0.67                                    | 0.04 | 0.05  | 1.30 |
| Strength          | -0.17                              | 0.60 | -0.81 | 0.47 | 0.13                               | 0.66 | -0.47 | 0.72 | 0.22                                    | 0.43 | -0.35 | 0.79 |
| Wealth            | 0.42                               | 0.11 | -0.09 | 0.93 | 0.46                               | 0.04 | 0.02  | 0.90 | -0.06                                   | 0.91 | -1.19 | 1.06 |
| Age               | 0.64                               | 0.32 | -0.66 | 1.93 | -0.14                              | 0.81 | -1.27 | 0.99 | 0.10                                    | 0.78 | -0.65 | 0.85 |
| Mobility (1=no)   | 0.56                               | 0.19 | -0.30 | 1.42 | 0.16                               | 0.66 | -0.59 | 0.92 | 0.39                                    | 0.07 | -0.03 | 0.81 |
| Settled (1 = yes) | -0.26                              | 0.56 | -1.15 | 0.64 | 0.87                               | 0.00 | 0.34  | 1.39 | 0.92                                    | 0.00 | 0.40  | 1.44 |
| Camp 1            | 0.20                               | 0.78 | -1.30 | 1.70 | 0.09                               | 0.80 | -0.66 | 0.84 | 0.08                                    | 0.84 | -0.68 | 0.83 |
| Camp 2            | -0.89                              | 0.26 | -2.48 | 0.70 | 0.99                               | 0.13 | -0.32 | 2.29 | 1.00                                    | 0.13 | -0.30 | 2.31 |
| Camp 3            | -0.22                              | 0.58 | -1.01 | 0.57 | 0.11                               | 0.87 | -1.30 | 1.53 | 0.11                                    | 0.87 | -1.31 | 1.53 |
| Camp 4            | -0.49                              | 0.38 | -1.62 | 0.64 | 0.03                               | 0.93 | -0.65 | 0.71 | 0.10                                    | 0.76 | -0.57 | 0.77 |
| Dependent s       | -                                  | -    | -     | -    | 0.15                               | 0.75 | -0.83 | 1.14 | 0.12                                    | 0.80 | -0.86 | 1.11 |
| Strength*age      | -                                  | -    | -     | -    | -0.60                              | 0.26 | -1.68 | 0.48 | -                                       | -    | -     | -    |
| AIC               |                                    |      | 83.64 |      |                                    |      | 70.06 |      |                                         |      | 70.01 |      |



Degree:

|                   | Non-Interaction, non-control model |      |       |      | Dependents control and interaction |      |       |      | Non-interaction with dependents control |      |       |      |
|-------------------|------------------------------------|------|-------|------|------------------------------------|------|-------|------|-----------------------------------------|------|-------|------|
|                   | B                                  | P    | CI    | CI   | B                                  | P    | CI    | CI   | B                                       | P    | CI    | CI   |
| (Intercept)       | 1.13                               | 0.00 | 0.42  | 1.84 | 0.64                               | 0.04 | 0.02  | 1.25 | 0.75                                    | 0.02 | 0.13  | 1.37 |
| Degree            | -0.02                              | 0.94 | -0.55 | 0.50 | 0.03                               | 0.89 | -0.40 | 0.46 | 0.11                                    | 0.62 | -0.33 | 0.54 |
| Wealth            | 0.44                               | 0.09 | -0.07 | 0.95 | 0.45                               | 0.03 | 0.04  | 0.86 | 0.12                                    | 0.82 | -0.95 | 1.19 |
| Age               | 0.54                               | 0.39 | -0.73 | 1.82 | -0.19                              | 0.72 | -1.28 | 0.91 | 0.12                                    | 0.74 | -0.64 | 0.88 |
| Mobility (1=no)   | 0.58                               | 0.18 | -0.28 | 1.45 | 0.04                               | 0.92 | -0.70 | 0.77 | 0.37                                    | 0.08 | -0.05 | 0.78 |
| Settled (1 = yes) | -0.13                              | 0.73 | -0.92 | 0.65 | 0.82                               | 0.00 | 0.35  | 1.29 | 0.86                                    | 0.00 | 0.37  | 1.35 |
| Camp 1            | 0.32                               | 0.67 | -1.17 | 1.80 | -0.10                              | 0.73 | -0.73 | 0.52 | -0.05                                   | 0.88 | -0.69 | 0.60 |
| Camp 2            | -0.92                              | 0.26 | -2.54 | 0.71 | 0.98                               | 0.11 | -0.25 | 2.20 | 0.77                                    | 0.21 | -0.47 | 2.02 |
| Camp 3            | -0.23                              | 0.57 | -1.03 | 0.58 | 0.34                               | 0.62 | -1.09 | 1.78 | 0.02                                    | 0.97 | -1.41 | 1.46 |
| Camp 4            | -0.46                              | 0.42 | -1.61 | 0.69 | -0.05                              | 0.88 | -0.74 | 0.64 | 0.11                                    | 0.75 | -0.58 | 0.79 |
| Dependents        | -                                  | -    | -     | -    | 0.17                               | 0.72 | -0.80 | 1.14 | 0.01                                    | 0.98 | -0.97 | 1.00 |
| Degree*age        | -                                  | -    | -     | -    | -0.70                              | 0.10 | -1.54 | 0.14 | -                                       | -    | -     | -    |
| AIC               | 84.04                              |      |       |      | 68.34                              |      |       |      | 70.59                                   |      |       |      |
